# Supplementary material for: Siah2 control of T-regulatory cells limits anti-tumor immunity
Source: PubMed Central journal article supplement (PMC6946684; doi:10.1038/s41467-019-13826-7), 2020-01-07
Supplement: 41467_2019_13826_MOESM1_ESM.pdf [file 41467_2019_13826_MOESM1_ESM.pdf]

Siah2 control of T-regulatory cells limits anti-tumor  
immunity

Supplemental Figures (6)

Supplemental Tables (5)

Original Western Blots (3)

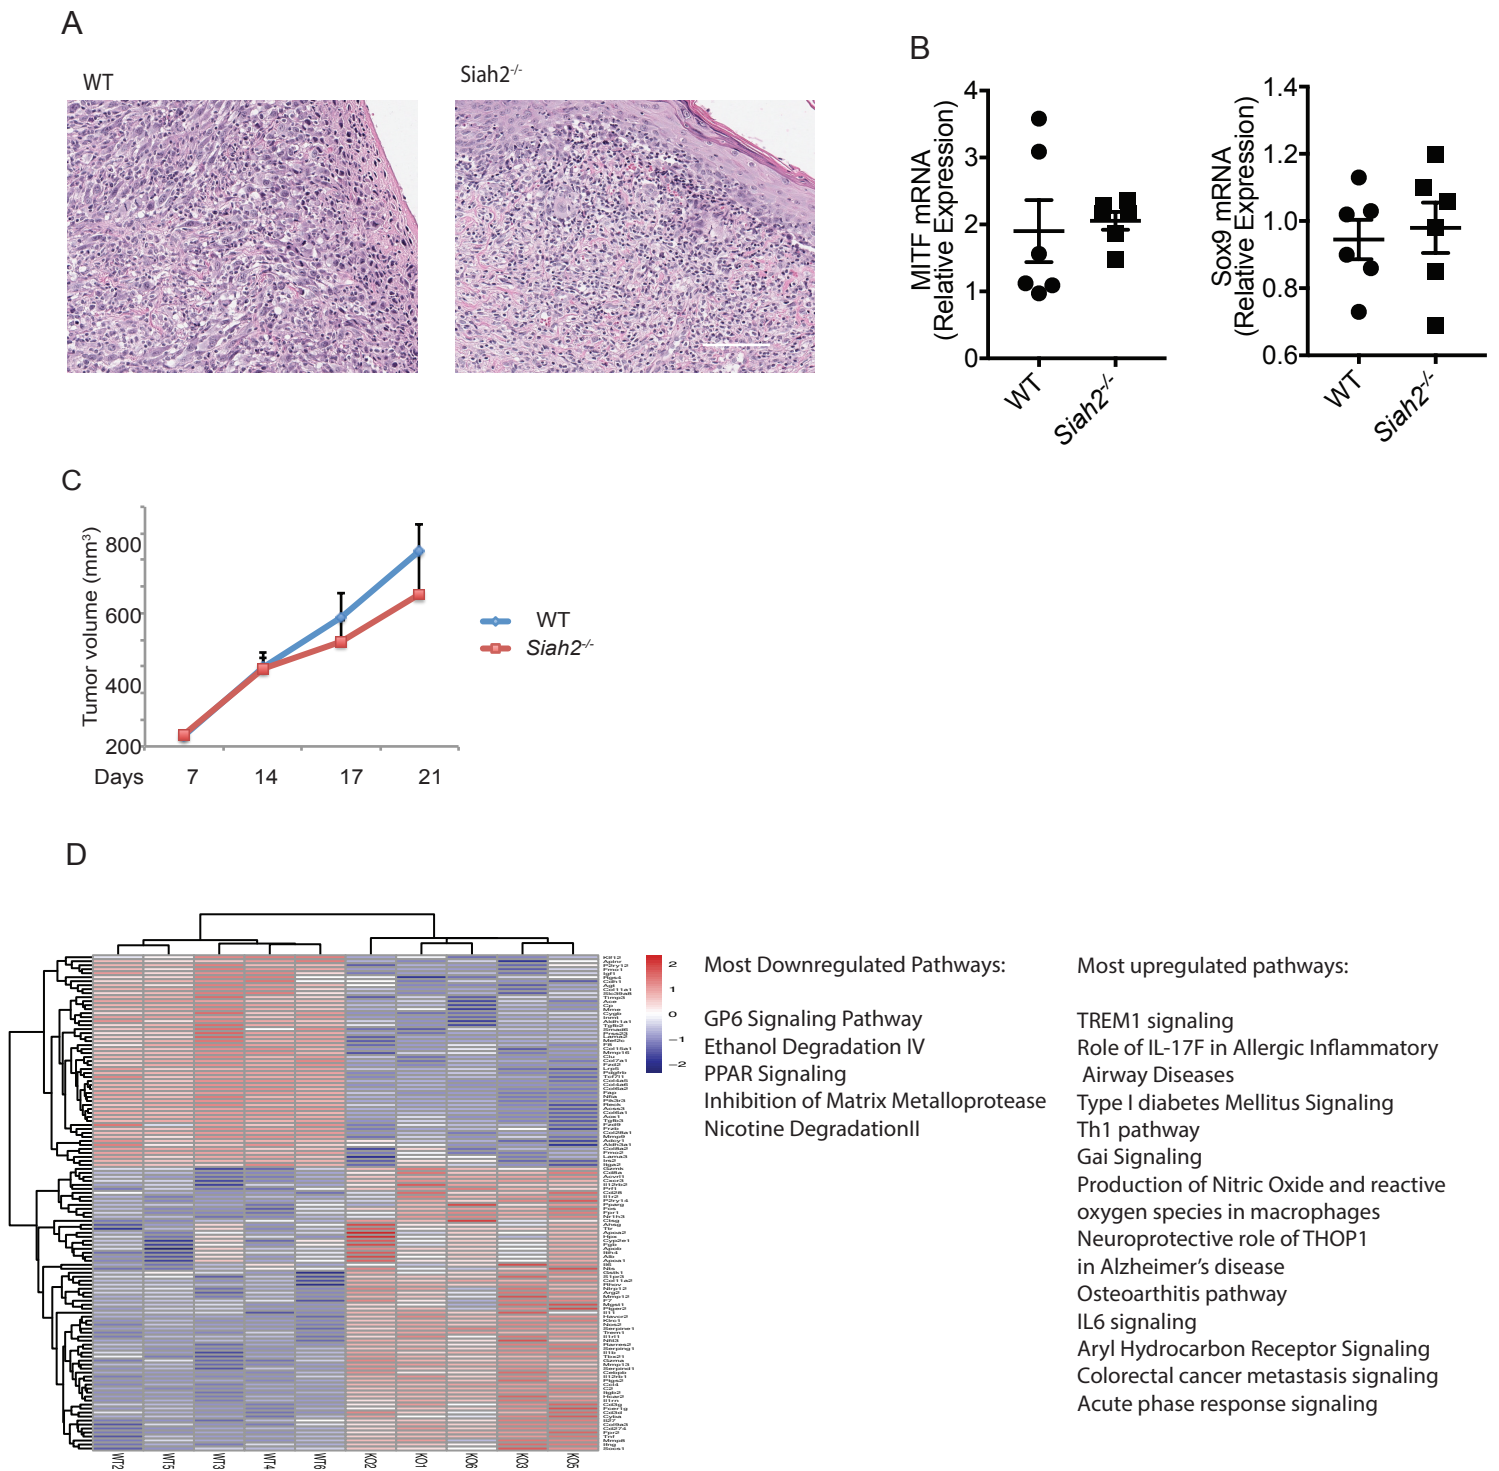

**Supplemental Figure 1. Melanomas grown in *Siah2<sup>-/-</sup>* mice exhibit immune phenotype.**

(A) YUMMER1.7 cells ( $4 \times 10^5$ ) were injected into the flank of 5-7 weeks old *Siah2* WT or *Siah2<sup>-/-</sup>* male mice. H&E staining was performed on tumors collected after 11 days, Scale bar, 100  $\mu\text{m}$ . (B) qPCR analysis of indicated mRNAs was performed on tumors collected 11 days after injection ( $n=6$ , both genotypes, Mean  $\pm$  s.e). (C) YUMMER1.7 cells ( $10^6$ ) were injected into the flank of 5-7 weeks-old *Siah2* WT or *Siah2<sup>-/-</sup>* male mice and tumor growth (volume) was assessed over time.  $N=4$  for both genotypes, Mean  $\pm$  s.e. (D) RNAseq analysis of tumors from both genotypes collected 11 days after melanoma cell injection. Heat map shows all the genes related to the significant up/downregulated pathways using the pathway criteria Z-score  $> 1$  and p value  $< 0.01$  ( $n=5$ ).

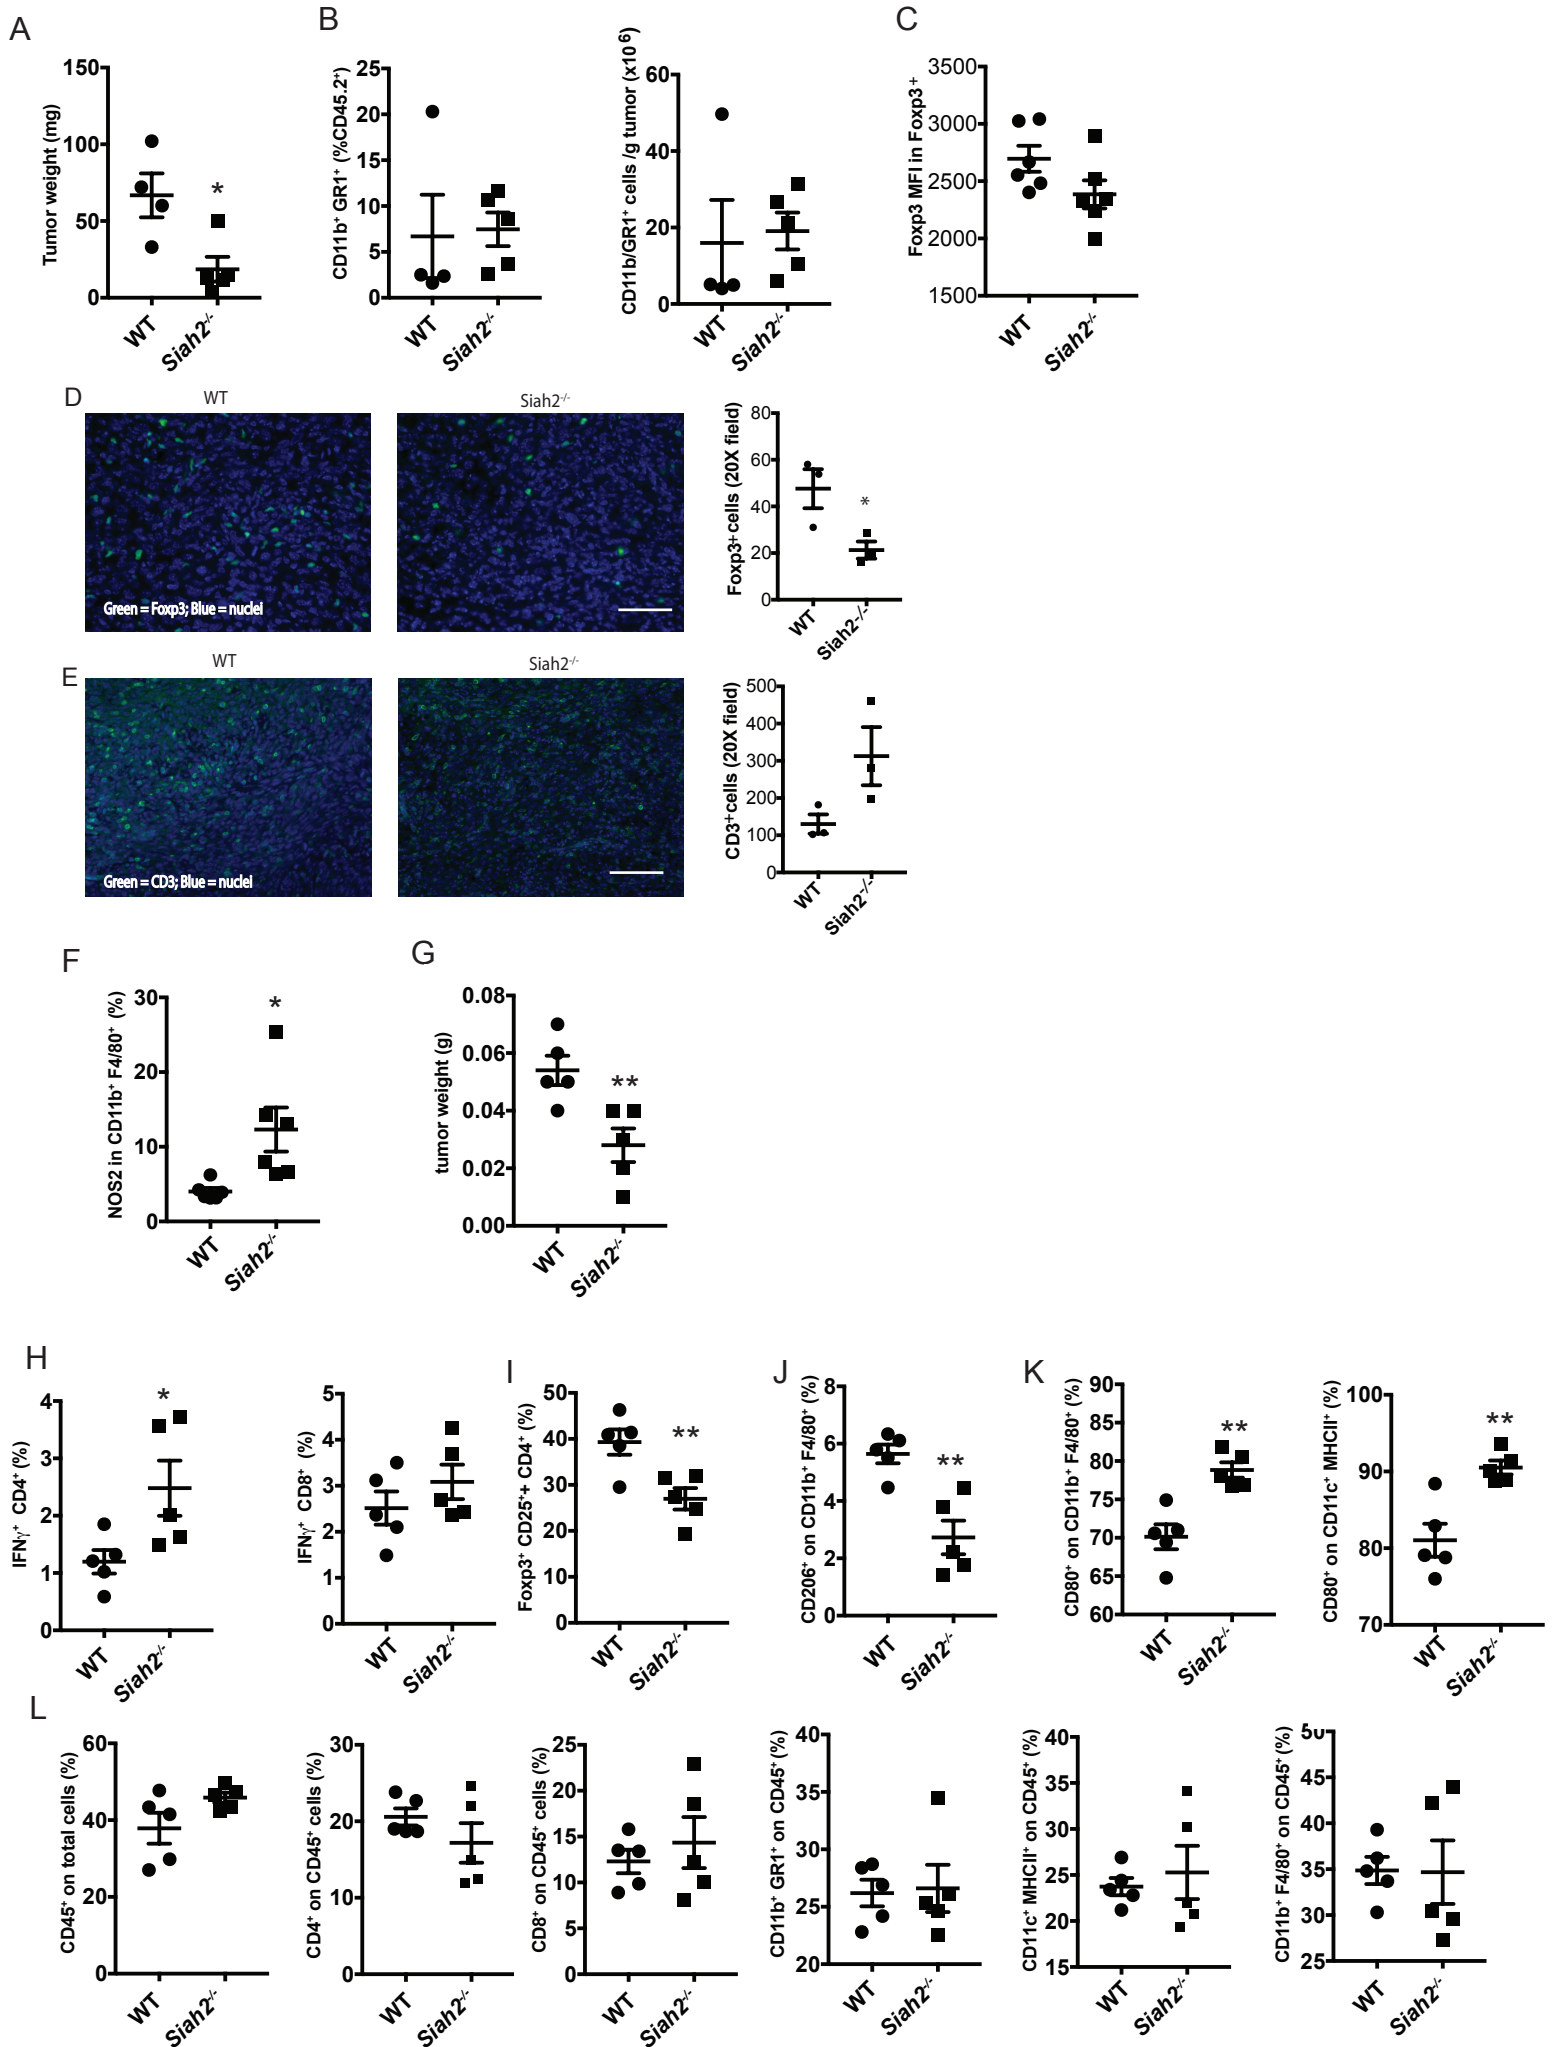

## Supplemental Figure 2.

### **Siah2 loss in tumor microenvironment increases frequency of intra-tumoral effector T cells and decreases tumor-infiltrating Tregs.**

(A) Weights of tumors from YUMMER1.7 melanoma cell-injected in *Siah2* WT or *Siah2*<sup>-/-</sup> mice collected 11 days after injection (WT n=4; KO n=5). (B) Quantification of CD11B<sup>+</sup> GR1<sup>+</sup> cells on day 11 after tumor injection represented as total number/g tumor tissue or percentage of CD45.2<sup>+</sup> immune cells (WT n=4; KO n=5). (C) FDXP3 expression in CD4<sup>+</sup> FDXP3<sup>+</sup> cells based on flow cytometry (n=6) on day 11 after tumor cells injection. FDXP3 (D) and CD3 (E) staining of tumors from *Siah2* WT or *Siah2*<sup>-/-</sup> mice, as assessed 11 days after melanoma cells injection (left panels), plus quantification (right) (n=3). Scale bar, 100  $\mu$ m. (F) Percentage of NOS2<sup>+</sup> cells among CD11b/F480<sup>+</sup> cells on day 11 after tumor cells injection (WT n=4; KO n=5). (G) Weights of tumors from YUMM1.7 cell-injected in *Siah2* WT or *Siah2*<sup>-/-</sup> mice, collected 11 days after injection (n=5). (H) Frequencies of tumor-infiltrating IFN  $\gamma$ -producing CD8<sup>+</sup> and CD4<sup>+</sup> T cells on day 11 after tumor inoculation and following overnight stimulation in vitro with melanoma peptides (n=5). Frequencies of tumor-infiltrating FDXP3<sup>+</sup> CD25<sup>+</sup> cells within the CD4<sup>+</sup> T cell population (I), CD206<sup>+</sup> cells among CD11b/F4/80-positive cells (J), and CD80<sup>+</sup> cells among CD11b/F4/80<sup>+</sup> and CD11c<sup>+</sup> MHCII<sup>+</sup> cells (K) on day 11 after tumor inoculation (n=5). (L) Frequencies of tumor-infiltrating CD45<sup>+</sup> among total cells or CD4<sup>+</sup>, CD8<sup>+</sup>, CD11B<sup>+</sup> GR1<sup>+</sup> and CD11b<sup>+</sup>/F4/80<sup>+</sup>, CD11c<sup>+</sup> MHCII<sup>+</sup> cells among CD45<sup>+</sup> on day 11 after tumor injection (n=5). Mean  $\pm$  s.e. Data were analyzed by unpaired t-test. \*\*P < 0.005, \*P < 0.05 compared with WT.

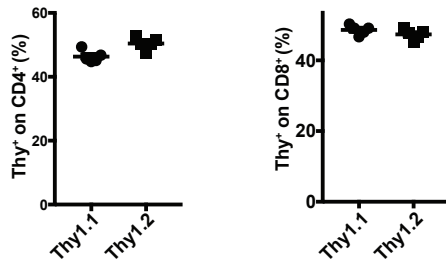

**Supplemental Figure 3. Frequencies of Thy1.1, Thy1.2 markers in CD4<sup>+</sup> and CD8<sup>+</sup> cells in blood of transplanted mice.** Frequencies of cells expressing Thy1.1 and Thy1.2 markers among CD4<sup>+</sup> and CD8<sup>+</sup> cells from blood samples of mice transplanted 8 weeks earlier with mixed BM from WT (Thy1.1) and Siah2<sup>-/-</sup> (Thy1.2) mice, prior to tumor cell injection (n=5), Mean ± s.e.

**A**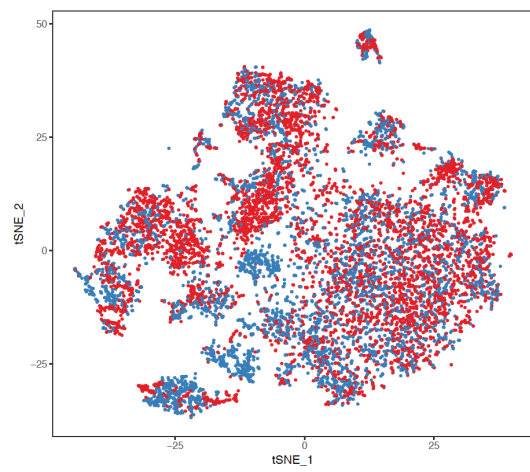**B**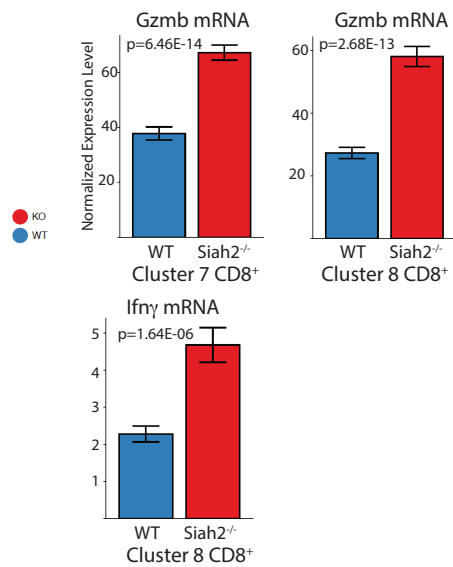**D**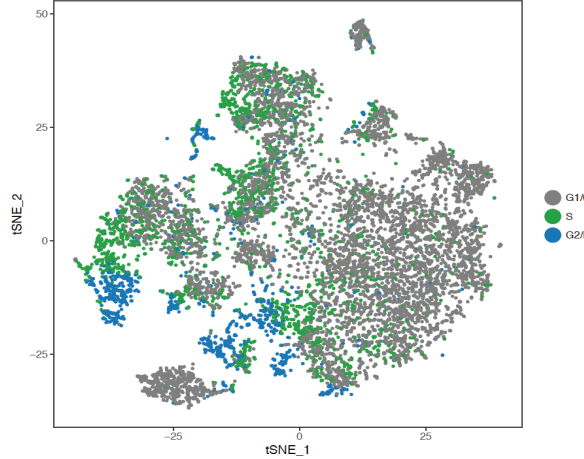**C**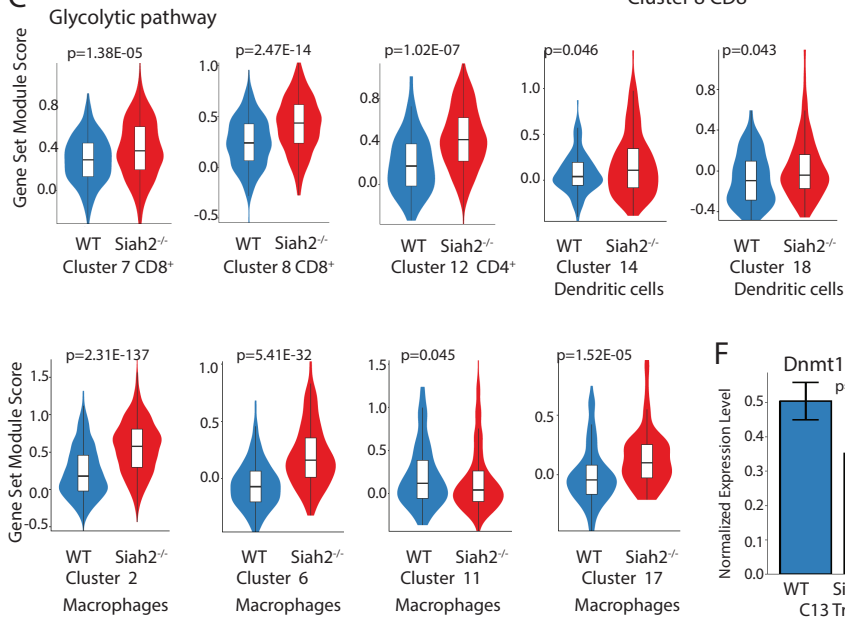**E**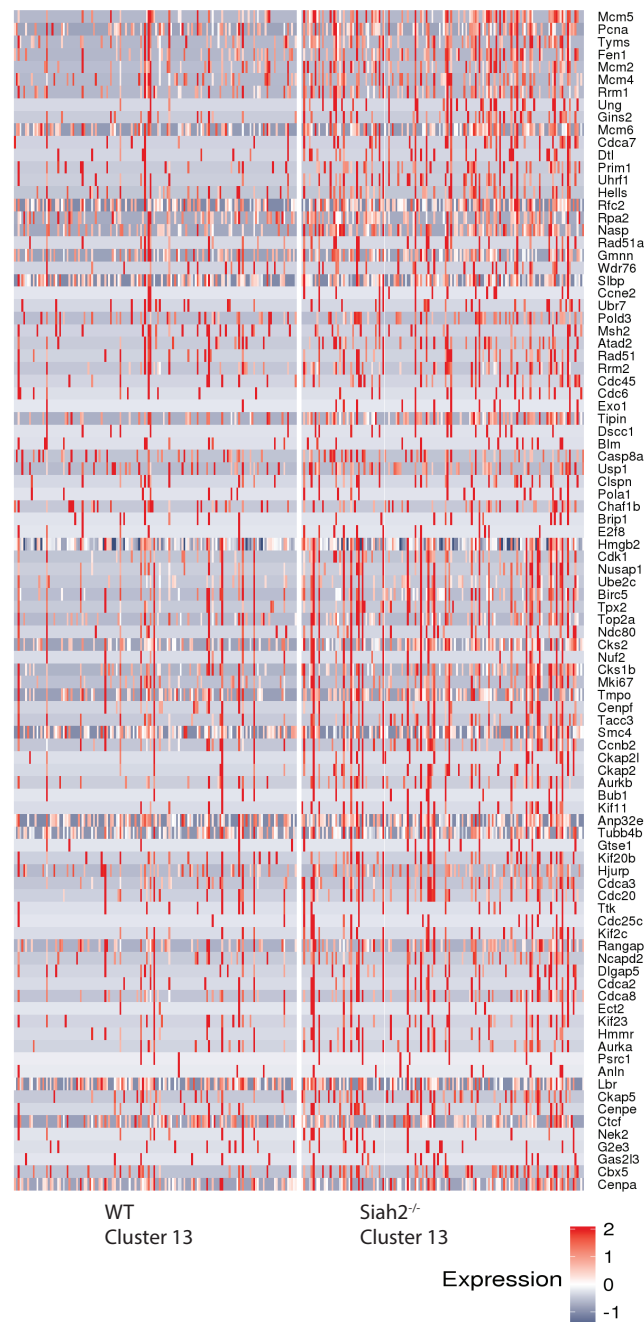**G**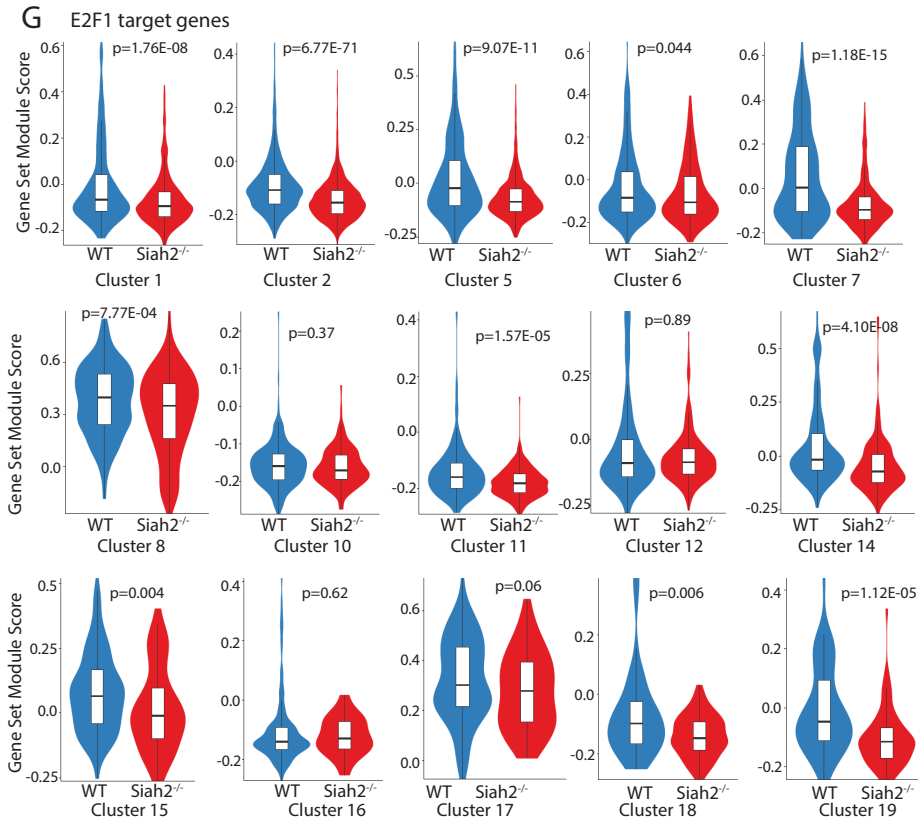

**Supplemental Figure 4. Increased E2F1 and glycolytic pathway genes in *Siah2*<sup>-/-</sup> immune cells clusters.**

(A) tSNE plot of CD45<sup>+</sup> cells from YUMMER1.7 melanoma tumors collected 12 days after their inoculation into WT or *Siah2*<sup>-/-</sup> mice showing WT and *Siah2*<sup>-/-</sup> distribution within each cluster. (B) mRNA expression of indicated genes identified by single-cell RNAseq within the indicated clusters, both genotypes. (C) Violin plot for expression levels of genes involved in the glycolytic pathway determined by single-cell RNAseq in different clusters. (D) tSNE plot of CD45<sup>+</sup> cells from YUMMER1.7 melanoma tumors collected 12 days after their inoculation into WT or *Siah2*<sup>-/-</sup> mice showing distribution of the different cell cycle phases within each cluster. (E) Heat map showing scaled expression values of genes involved in cell cycle. (F) mRNA expression of DNMT1 identified by single-cell RNAseq within the Treg cluster (C13), both genotypes. (G) Violin plot for expression levels of E2F1 target genes determined by single-cell RNAseq in different clusters. P value is from Wilcoxon rank-sum test. Mean  $\pm$  s.e.

A

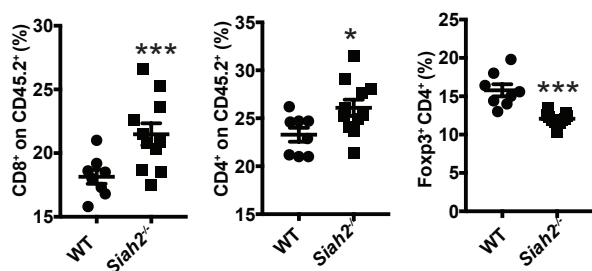

B

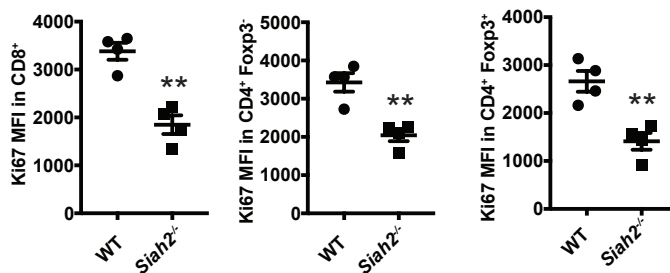

C

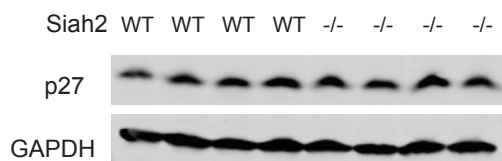

D

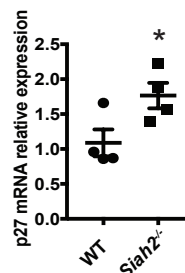

E

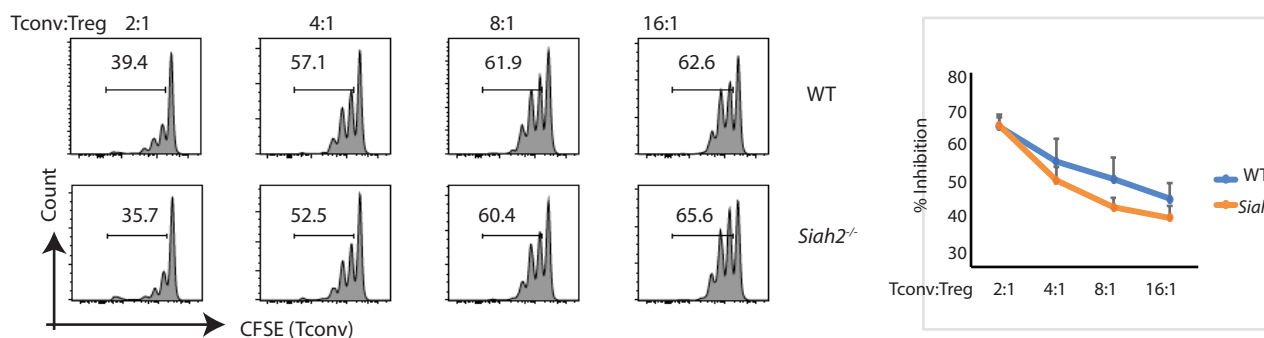

F

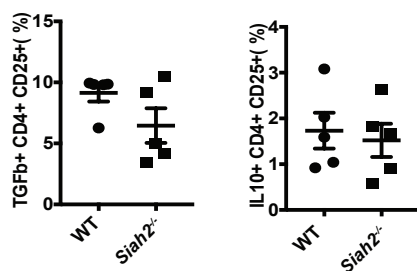

G

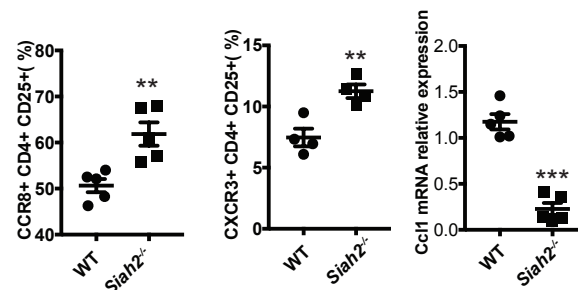

H

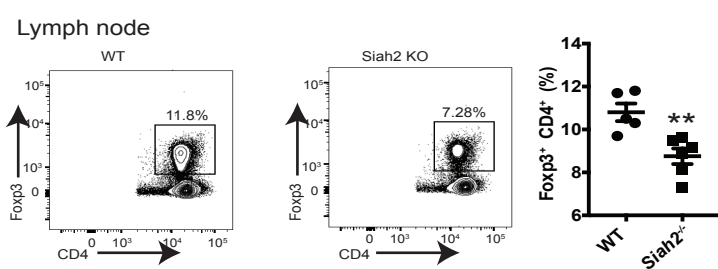

I

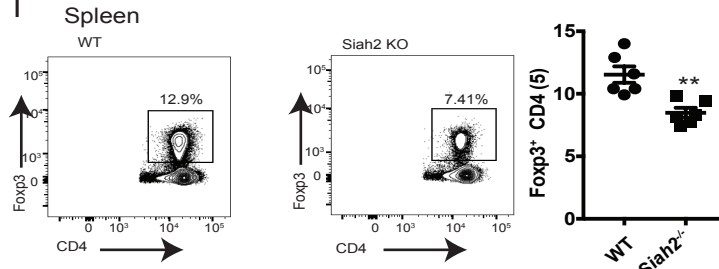

J

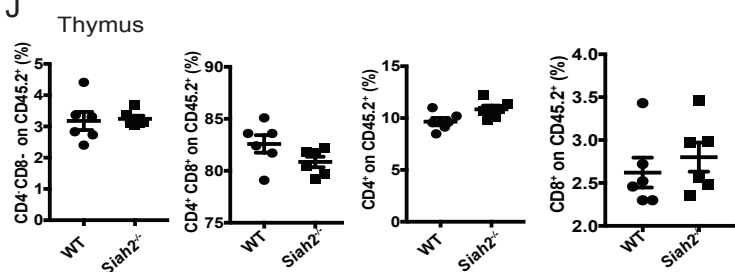

K

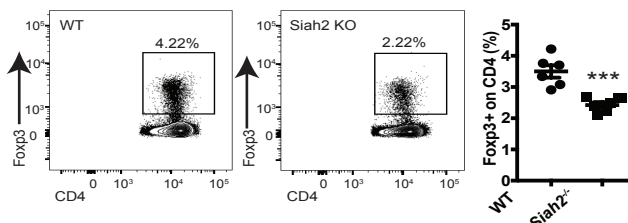

L

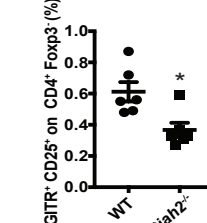



## Supplementary Figure 5.

**Comparable Treg frequency in tumor free WT and *Siah2*<sup>-/-</sup> mice; comparable treg suppression function in vitro in *Siah2*<sup>-/-</sup> and WT treg.**

**(A)** Draining lymph nodes from *Siah2* WT and *Siah2*<sup>-/-</sup> mice were collected and the percentage of CD4<sup>+</sup> and CD8<sup>+</sup> cells among CD45.2<sup>+</sup> cells, plus the percentage of Foxp3<sup>+</sup> cells in CD4<sup>+</sup> cells were determined by flow cytometry (WT n=8; *Siah2*<sup>-/-</sup> n=11). **(B)** Lymphocytes were cultured and stimulated with CD3/CD28 antibodies in presence of IL2, and 3 days later assessed for Ki67 expression in CD8<sup>+</sup>, CD4<sup>+</sup> Foxp3<sup>-</sup>, CD4<sup>+</sup> Foxp3<sup>+</sup> cells based on flow cytometry (n=4). **(C)** Lysates made from unstimulated lymphocytes derived from draining Lymph nodes were prepared and immunoblotted for p27 and GAPDH (n=4). **(D)** q-RTPCR analysis of p27 mRNA from lymphocytes stimulated as in panel B. n=4, both genotypes. **(E)** In vitro suppression assay of conventional CD4<sup>+</sup> T cells (Tconv.) labeled with cytosolic dye carboxyfluorescein diacetate succinimidyl ester (CFSE) in the presence of WT or *Siah2*<sup>-/-</sup> Treg cells (CD4<sup>+</sup> CD25<sup>+</sup>) and quantification (right panel). Numbers indicate the percentage of cells in the indicated area. Conventional CD4<sup>+</sup> T cell division was analyzed by CFSE dilution at the indicated ratios of Tconv and Treg cells following 3 day stimulation with plate bound anti-CD3 and anti-CD28 (both 2ug/mL). Graph on the right panel is the average percent inhibition (100 - % divided) of three individual experiments (five biological replicates) of WT versus *Siah2*<sup>-/-</sup> Treg cells. **(F)** Frequencies of tumor-infiltrating TGFβ<sup>+</sup> or IL10<sup>+</sup> CD4<sup>+</sup>/CD25<sup>+</sup> T cells 11 days after tumor cells inoculation and following overnight stimulation in vitro with PMA and Ionomycin (n=5). **(G)** Left two panels: Percentage of CCR8<sup>+</sup> and CXCR3<sup>+</sup> cells among CD4/CD25<sup>+</sup> cells on day 11 after tumor cells injection (n=5 for CCR8<sup>+</sup> and n=4 for CXCR3<sup>+</sup> cells), right panel: qPCR analysis of Ccl1 mRNA was performed on tumors collected 11 days after injection (n=5, both genotypes, Mean ± s.e). Frequencies of Foxp3<sup>+</sup> cells within the CD4 population from the lymph nodes **(H)** and spleen **(I)** of tumor-free mice (n=5). **(J)** Frequencies of CD4/CD8 double negative, CD4/CD8 double-positive, and single-positive CD4 or CD8 cells from thymus of *Siah2* WT and *Siah2*<sup>-/-</sup> mice (n=5). Frequencies of Foxp3-positive cells in the CD4 population **(K)** and GITR<sup>+</sup> CD25<sup>+</sup> in the CD4<sup>+</sup> Foxp3<sup>-</sup> population **(L)** from thymus of *Siah2* WT and *Siah2*<sup>-/-</sup> mice (n=5). Mean ± s.e. Data were analyzed by unpaired t-test. \*\*\*P < 0.0005, \*\*P < 0.005, \*P < 0.05 compared with WT.

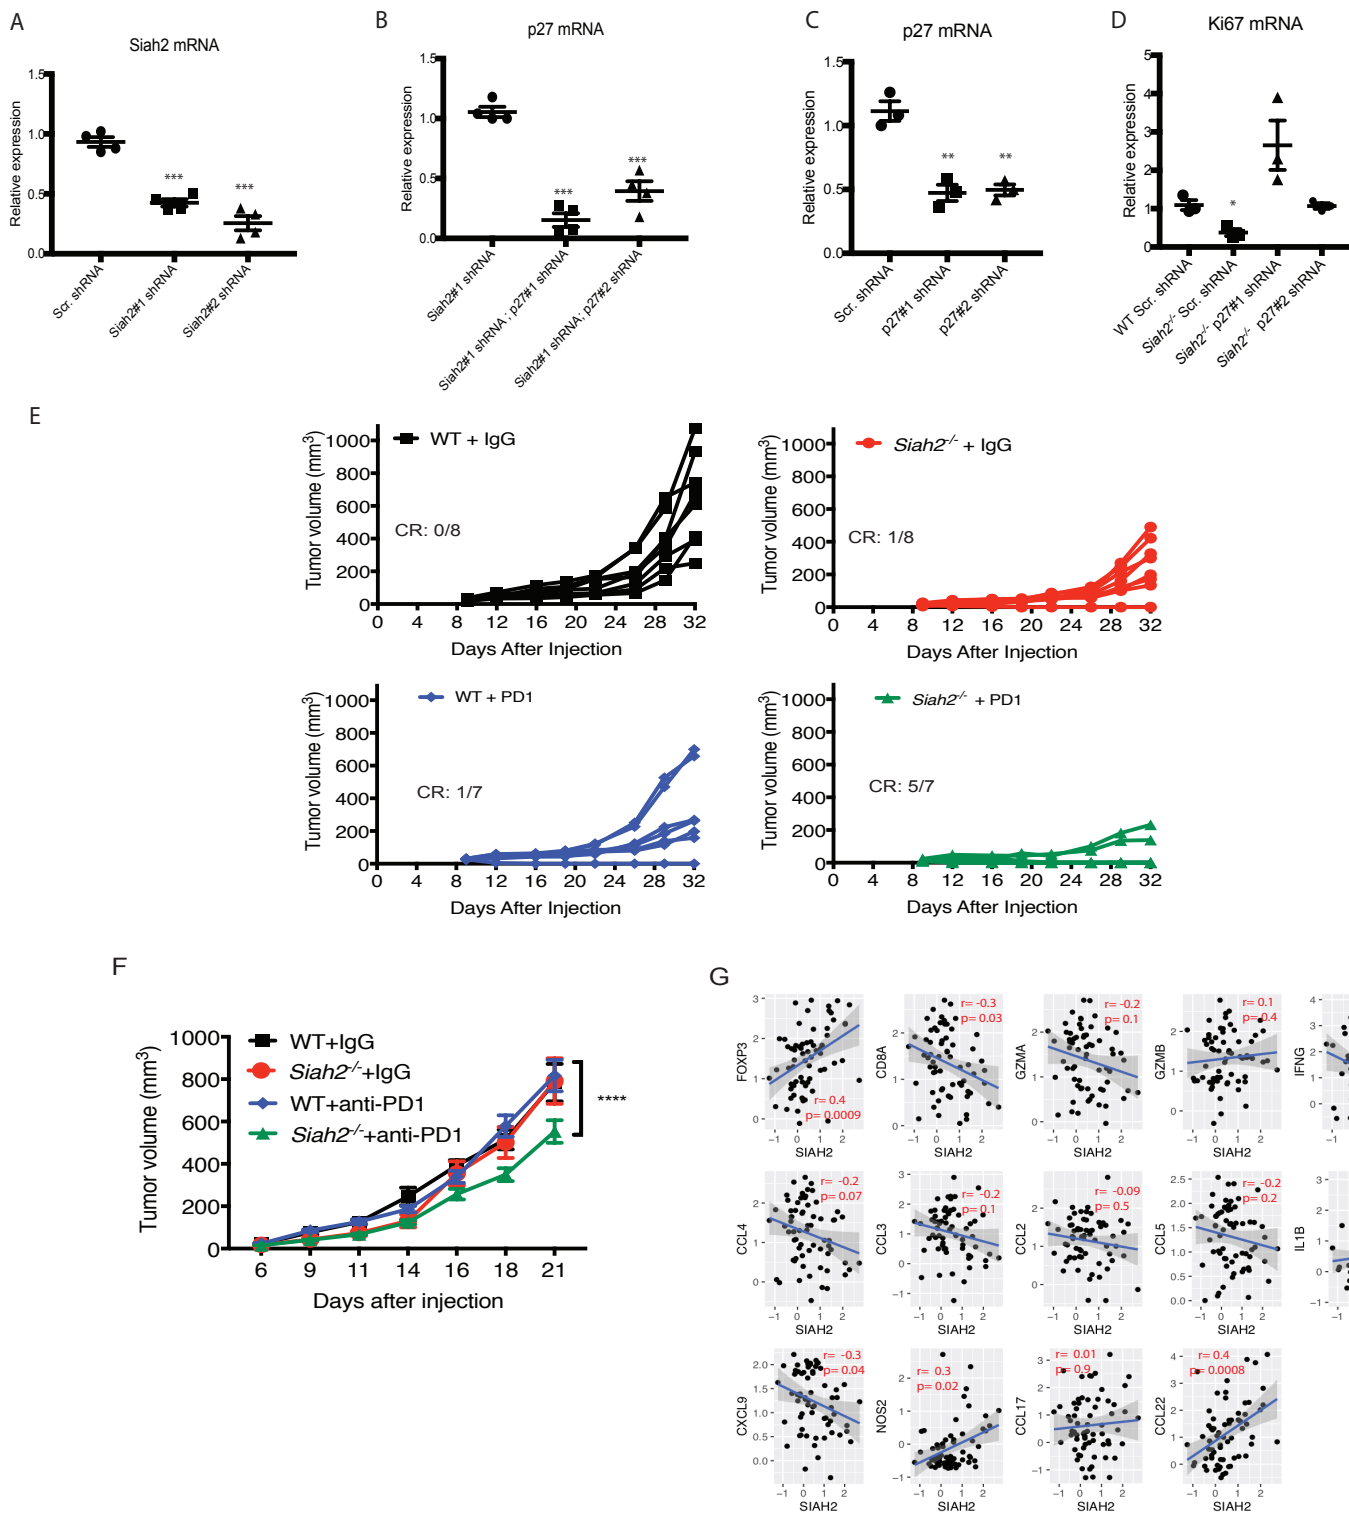

**Supplemental Figure 6. Effective PD1 therapy in *Siah2*<sup>-/-</sup> grown tumors; *Siah2* expression in immune responsive melanomas.**

**A** and **B**, growth inhibition upon *Siah2* deletion is p27 dependent. q-RT-PCR analysis of *Siah2* (A) and p27 (B) mRNA from Jurkat cells depleted of *Siah2* and p27 after infection with shRNA encoding lentiviruses. Mean  $\pm$  s.e., n=4. **C** and **D**, growth inhibition upon *Siah2* deletion in Treg cells is p27 dependent: q-RT-PCR analysis of p27 (C) and Ki67 (D) mRNA from isolated WT or *Siah2*<sup>-/-</sup> Treg cells in which p27 was knocked down after infection with shRNA encoding lentiviruses. Mean  $\pm$  s.e., n=3. **E**, individual (J) tumor growth curves over time of YUMM1.7 cells (150,000) inoculated in WT and *Siah2*<sup>-/-</sup> mice and treated with anti-PD1 antibody. Mice were treated with either rat isotype (IgG) or anti-PD1 antibody (200  $\mu$ g/ mouse; 3 times per week for a total of 5 times) starting from day 7 after melanoma cells injection. WT and *Siah2*<sup>-/-</sup> IgG (n=8); WT and *Siah2*<sup>-/-</sup> anti-PD1 (n=7). Complete regression (CR) rates at study termination are shown (J). **F**, MC38 cells (500,000) were inoculated in WT (n=8) and *Siah2*<sup>-/-</sup> (n=7) mice. Seven days later, mice were subjected to administration of anti-PD1 antibody (100  $\mu$ g/ mouse) or rat isotype (IgG) 3 times per week, for total of 4 injections. Mean  $\pm$  s.e. data were analyzed by unpaired t-test (A-D) or two-way ANOVA with Bonferroni multiple comparison (F). \*\*\*P < 0.0005, \*\*P < 0.005, \*P < 0.05 compared to Scr control. shRNA (A, C, D), *Siah2*#1 shRNA (B), WT + anti-PD1 (F). **G**, Correlation of *Siah2* and Foxp3 expression in high immunogenic human melanoma specimens; Shown are Spearman's rank correlations that are indicated for each gene (R and P values).

A

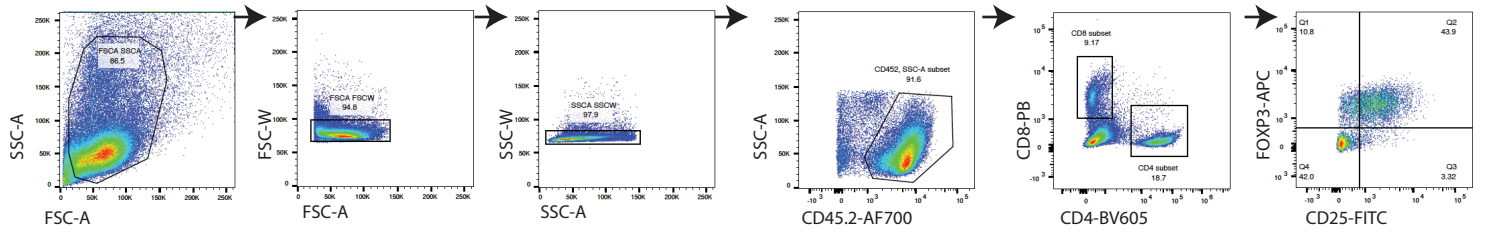

B

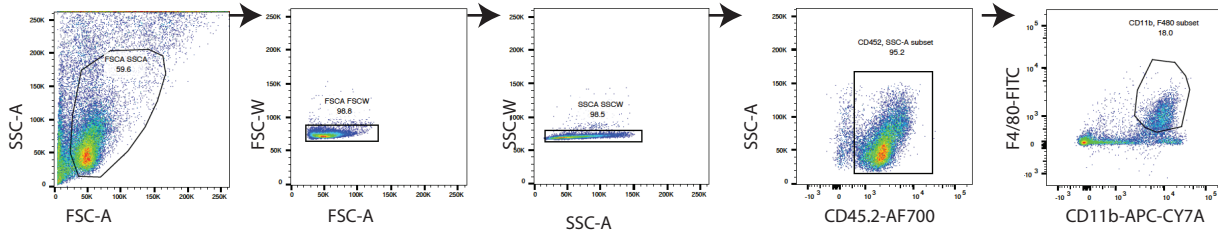

C

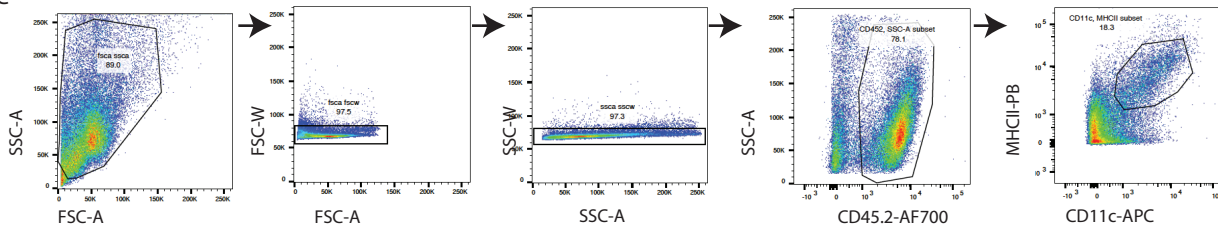

**Supplementary Figure 7. Gating strategy for immune cells analysis.** (A) Gating strategy of the tumor infiltrating CD45<sup>+</sup>, CD4<sup>+</sup>, CD8<sup>+</sup>, FOXP3<sup>+</sup> CD25<sup>+</sup> cells. (B) Gating strategy of the tumor infiltrating CD11b<sup>+</sup>F4/80<sup>+</sup> cells. (C) Gating strategy of the tumor infiltrating CD11c<sup>+</sup> MHCII<sup>+</sup> cells.

*Supplemental Table 1: List of primers used for QPCR analysis*

| <b>Species</b> | <b>Gene</b>       | <b>Primer Forward</b>   | <b>Primer Reverse</b>   |
|----------------|-------------------|-------------------------|-------------------------|
| mouse          | Ccl17             | TACCATGAGGTCACTTCAGATGC | GCACTCTCGGCCTACATTGG    |
| mouse          | Nos2              | GTTCTCAGCCCAACAATACAAGA | GTGGACGGGTCGATGTCAC     |
| mouse          | IFNg              | GCCACGGCACAGTCATTGA     | TGCTGATGGCCTGATTGTCTT   |
| mouse          | Cxcl9             | GGAGTTCGAGGAACCCTAGTG   | GGGATTTGTAGTGGATCGTGC   |
| mouse          | Ccl22             | AGGTCCTATGGTGCCAATGT    | CGGCAGGATTTTGAGGTCCA    |
| mouse          | Foxp3             | CACCTATGCCACCCTTATCCG   | CATGCGAGTAAACCAATGGTAGA |
| mouse          | Cdkn1b (p27)      | TCAAACGTGAGAGTGTCTAACG  | CCGGGCCGAAGAGATTTCTG    |
| mouse          | Ccne1 (Cyclin E1) | CTCCGACCTTTCAGTCCGC     | CACAGTCTTGTCAATCTTGGCA  |
| mouse          | TK1               | AGTGCCTGGTCATCAAGTATGC  | GCTGCCACAATTACTGTCTTGC  |
| mouse          | Mki67             | ATCATTGACCGCTCCTTTAGGT  | GCTCGCCTTGATGGTTCCT     |
| mouse          | Dnmt1             | ACTCCCTTCGGGCATAGCAT    | AGGTTGCAGACGACAGAACAG   |
| mouse          | Cdkn1b (p27)      | TCAAACGTGAGAGTGTCTAACG  | CCGGGCCGAAGAGATTTCTG    |
| human          | siah2             | TCTTCGAGTGTCCGGTCTG     | CGGCATTGGTTACACACCAG    |
| human          | Cdkn1b (p27)      | AACGTGCGAGTGTCTAACGG    | CCCTCTAGGGGTTTGTGATTCT  |
| mouse          | Ccl1              | GGCTGCCGTGTGGATACAG     | AGGTGATTTTGAACCCACGTTT  |

*Supplemental Table 2: List of genes used in glycolytic pathway*

| <b>Genes in glycolytic pathway</b> |
|------------------------------------|
| Hk1                                |
| Hk2                                |
| Hk3                                |
| Gpi1                               |
| Pfk1                               |
| Pfkp                               |
| Aldoa                              |
| Tpi1                               |
| Gapdh                              |
| Pgk1                               |
| Pgam1                              |
| Eno1                               |
| Pkm2                               |
| Ldha                               |

*Supplemental Table 3: List of genes upregulated by E2F1*

| <b>List of genes upregulated by E2F1</b> |
|------------------------------------------|
| Ccne1                                    |
| Tk1                                      |
| Mki67                                    |
| Dnmt1                                    |
| Cdk1                                     |
| Ccna1                                    |
| Cdc6                                     |
| Ccnd1                                    |
| Ccnd3                                    |
| Cdc25a                                   |
| Cdk2                                     |
| E2f1                                     |
| Cdc7                                     |
| Mcm2                                     |
| Mcm3                                     |
| Mcm4                                     |
| Mcm5                                     |
| Mcm6                                     |
| Orc1                                     |
| Rfc2                                     |
| Rfc3                                     |
| Rfc4                                     |
| Rrm1                                     |
| Rrm2                                     |
| Top2a                                    |
| Tyms                                     |

*Supplemental Table 4: List of genes associated with IFN $\gamma$ /IL12 pathway*

| <b>genes associated with IFN<math>\gamma</math>/IL12 pathway</b> |
|------------------------------------------------------------------|
| Cd28                                                             |
| Cd3d                                                             |
| Cd3e                                                             |
| Cd86                                                             |
| Prf1                                                             |
| Stat3                                                            |
| Jun                                                              |
| H2-Eb1                                                           |
| Il2ra                                                            |
| Etv5                                                             |
| Fos                                                              |
| IL2                                                              |
| Cd80                                                             |
| Irf1                                                             |
| Crebbp                                                           |
| Ppp3ca                                                           |
| Mapk8                                                            |
| Pias2                                                            |
| Cd247                                                            |
| Cd4                                                              |
| Ppp3cb                                                           |
| Cd3g                                                             |
| Ppp3r1                                                           |
| Il18r1                                                           |
| Stat4                                                            |
| Mapk9                                                            |
| Tgfb1                                                            |
| Tbx21                                                            |
| Il18rap                                                          |
| Ifng                                                             |
| Il18                                                             |

Supplemental Table 5: Number and frequency of cells across CD45+ (*Ptprc*-expressing) clusters, separated by sample (*Siah2*<sup>-/-</sup> or WT).

| cluster | sample | num_cd45+_sample | num_cells_cluster_sample | pct_cd45+_cluster_sample |
|---------|--------|------------------|--------------------------|--------------------------|
| C01     | KO     | 5349             | 687                      | 12.84                    |
| C01     | WT     | 3741             | 406                      | 10.85                    |
| C02     | KO     | 5349             | 1966                     | 36.75                    |
| C02     | WT     | 3741             | 1424                     | 38.06                    |
| C05     | KO     | 5349             | 552                      | 10.32                    |
| C05     | WT     | 3741             | 203                      | 5.43                     |
| C06     | KO     | 5349             | 244                      | 4.56                     |
| C06     | WT     | 3741             | 417                      | 11.15                    |
| C07     | KO     | 5349             | 414                      | 7.74                     |
| C07     | WT     | 3741             | 214                      | 5.72                     |
| C08     | KO     | 5349             | 318                      | 5.95                     |
| C08     | WT     | 3741             | 285                      | 7.62                     |
| C11     | KO     | 5349             | 307                      | 5.74                     |
| C11     | WT     | 3741             | 138                      | 3.69                     |
| C12     | KO     | 5349             | 324                      | 6.06                     |
| C12     | WT     | 3741             | 52                       | 1.39                     |
| C13     | KO     | 5349             | 150                      | 2.80                     |
| C13     | WT     | 3741             | 182                      | 4.87                     |
| C14     | KO     | 5349             | 161                      | 3.01                     |
| C14     | WT     | 3741             | 169                      | 4.52                     |
| C17     | KO     | 5349             | 60                       | 1.12                     |
| C17     | WT     | 3741             | 134                      | 3.58                     |
| C18     | KO     | 5349             | 85                       | 1.59                     |
| C18     | WT     | 3741             | 58                       | 1.55                     |
| C19     | KO     | 5349             | 81                       | 1.51                     |
| C19     | WT     | 3741             | 59                       | 1.58                     |



## Original Full Western Blots

Figure 5C

Figure 6A

Figure 6C

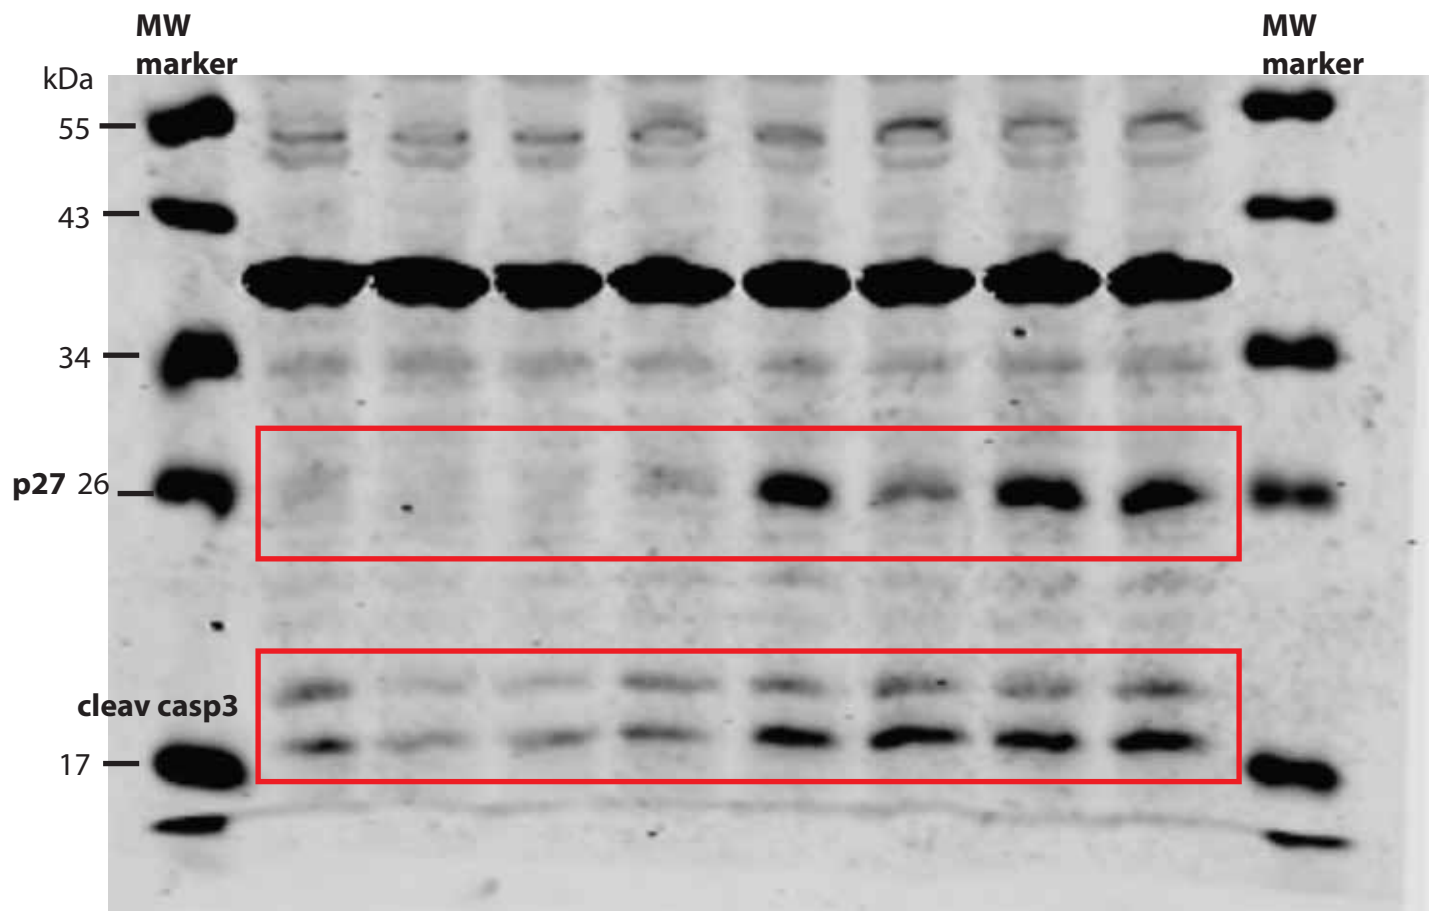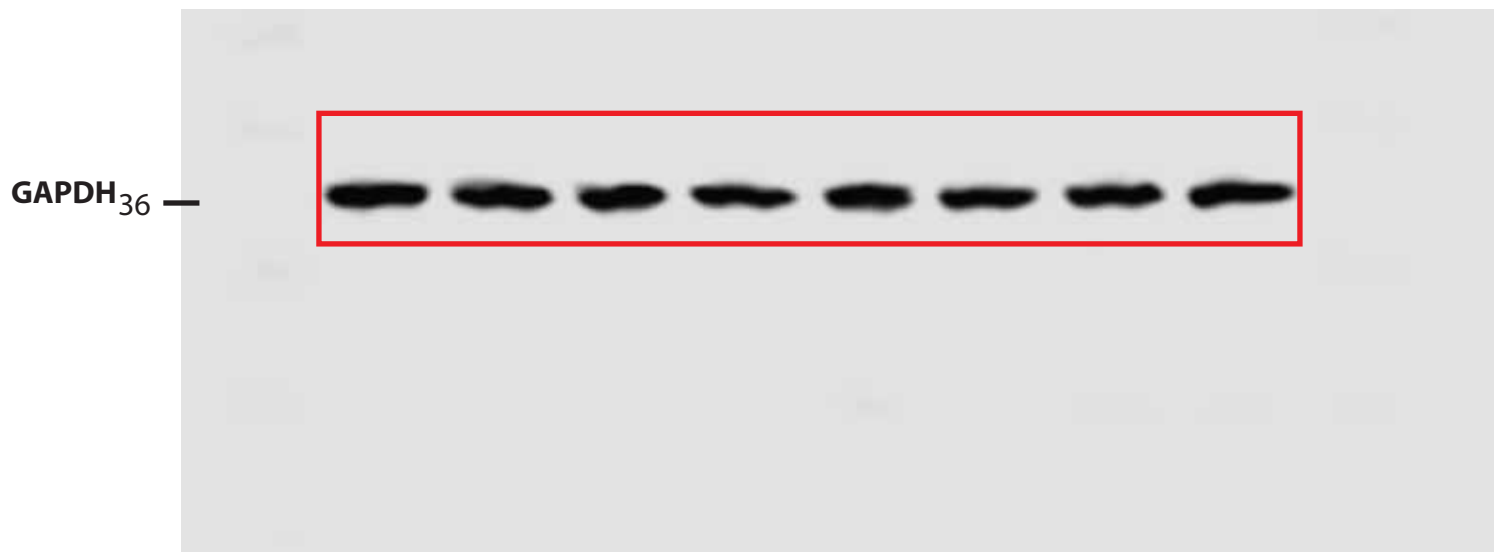

Western blot data for figure 5C

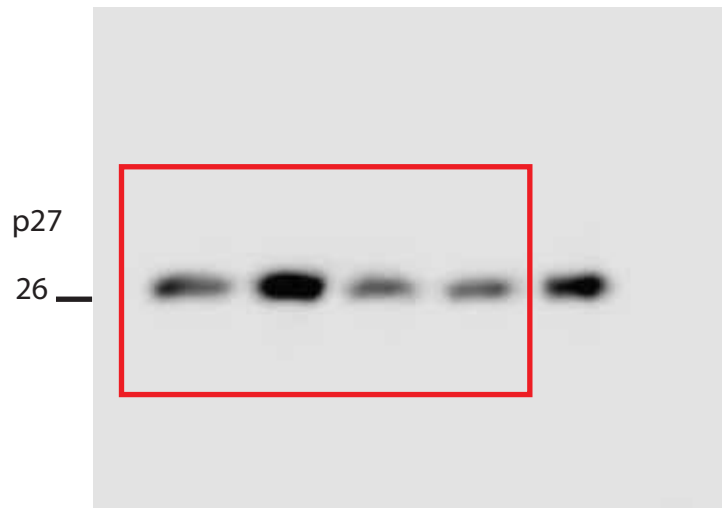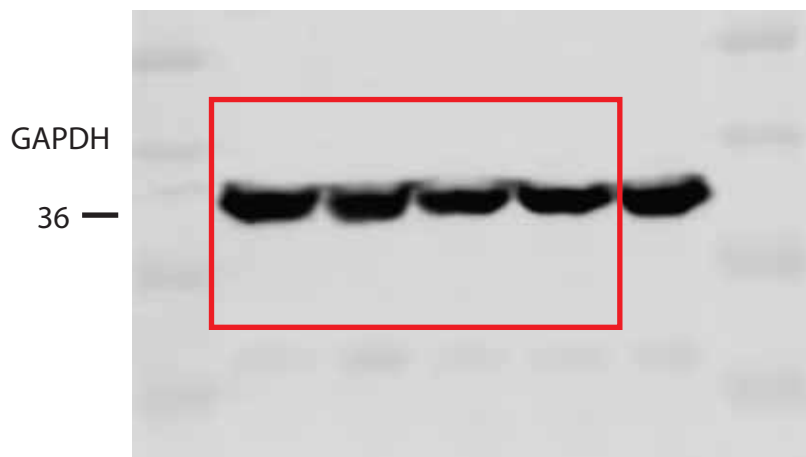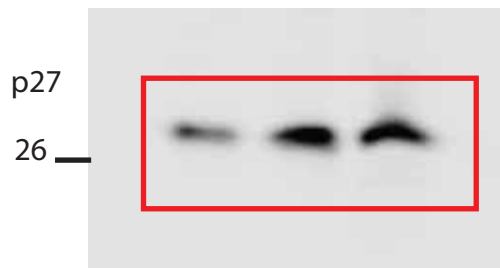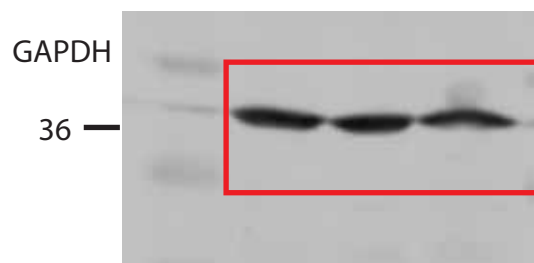

Western blot data for figure 6A

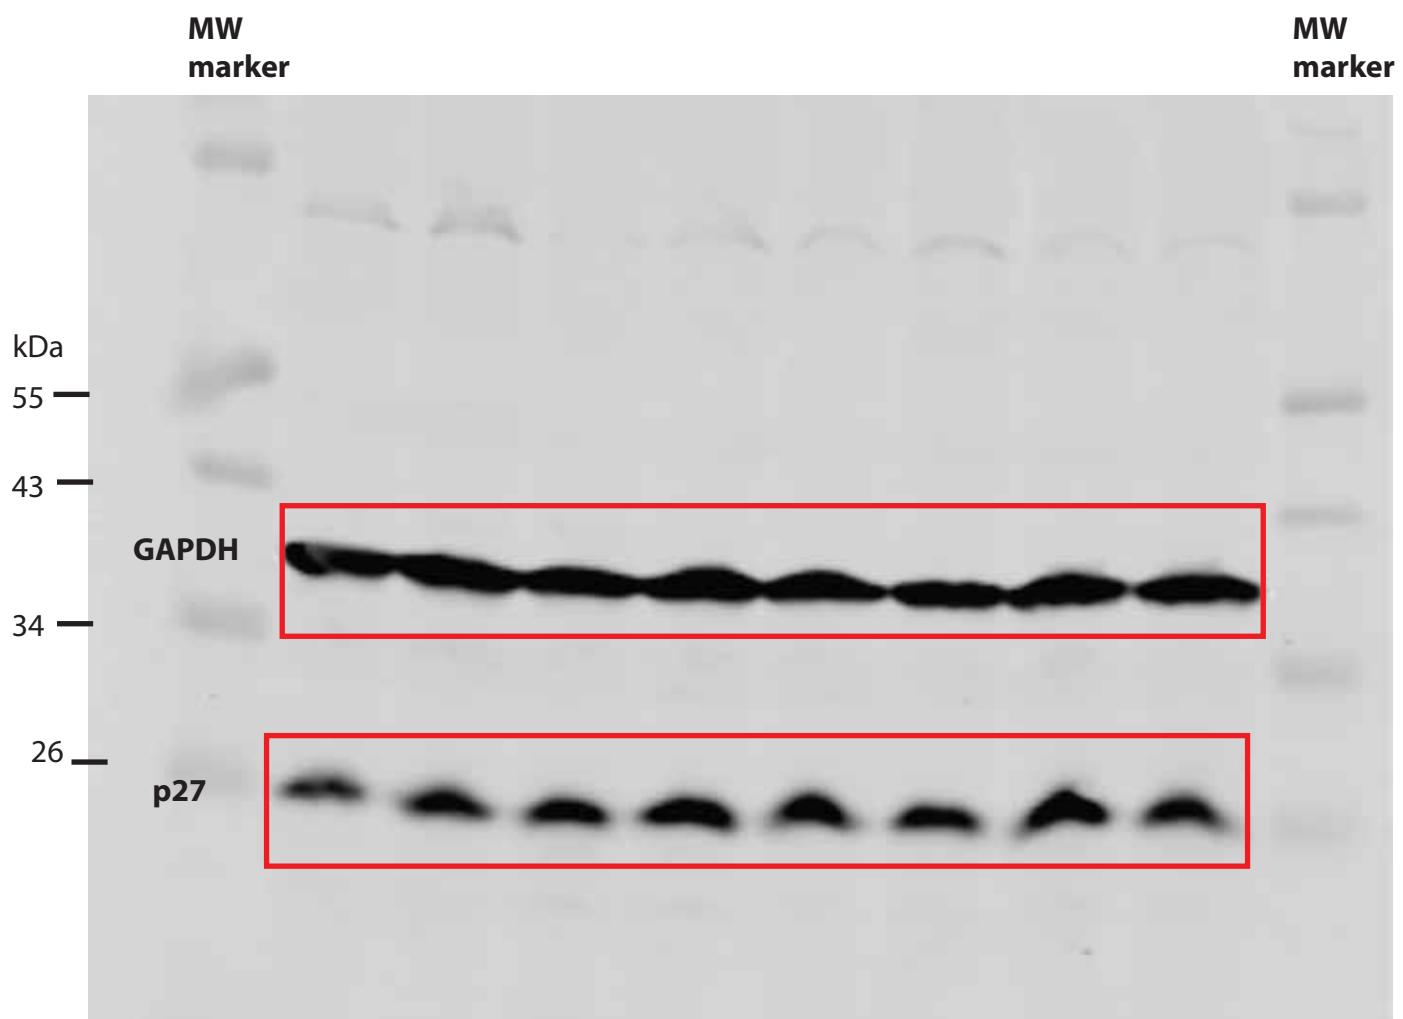

Western blot data for supplemental figure 6C
